# Supplementary material for: Characterization of the Zoarces viviparus liver transcriptome using massively parallel pyrosequencing
Source: PubMed Central journal article supplement (PMC2725146; doi:10.1186/1471-2164-10-345), 2009-07-31

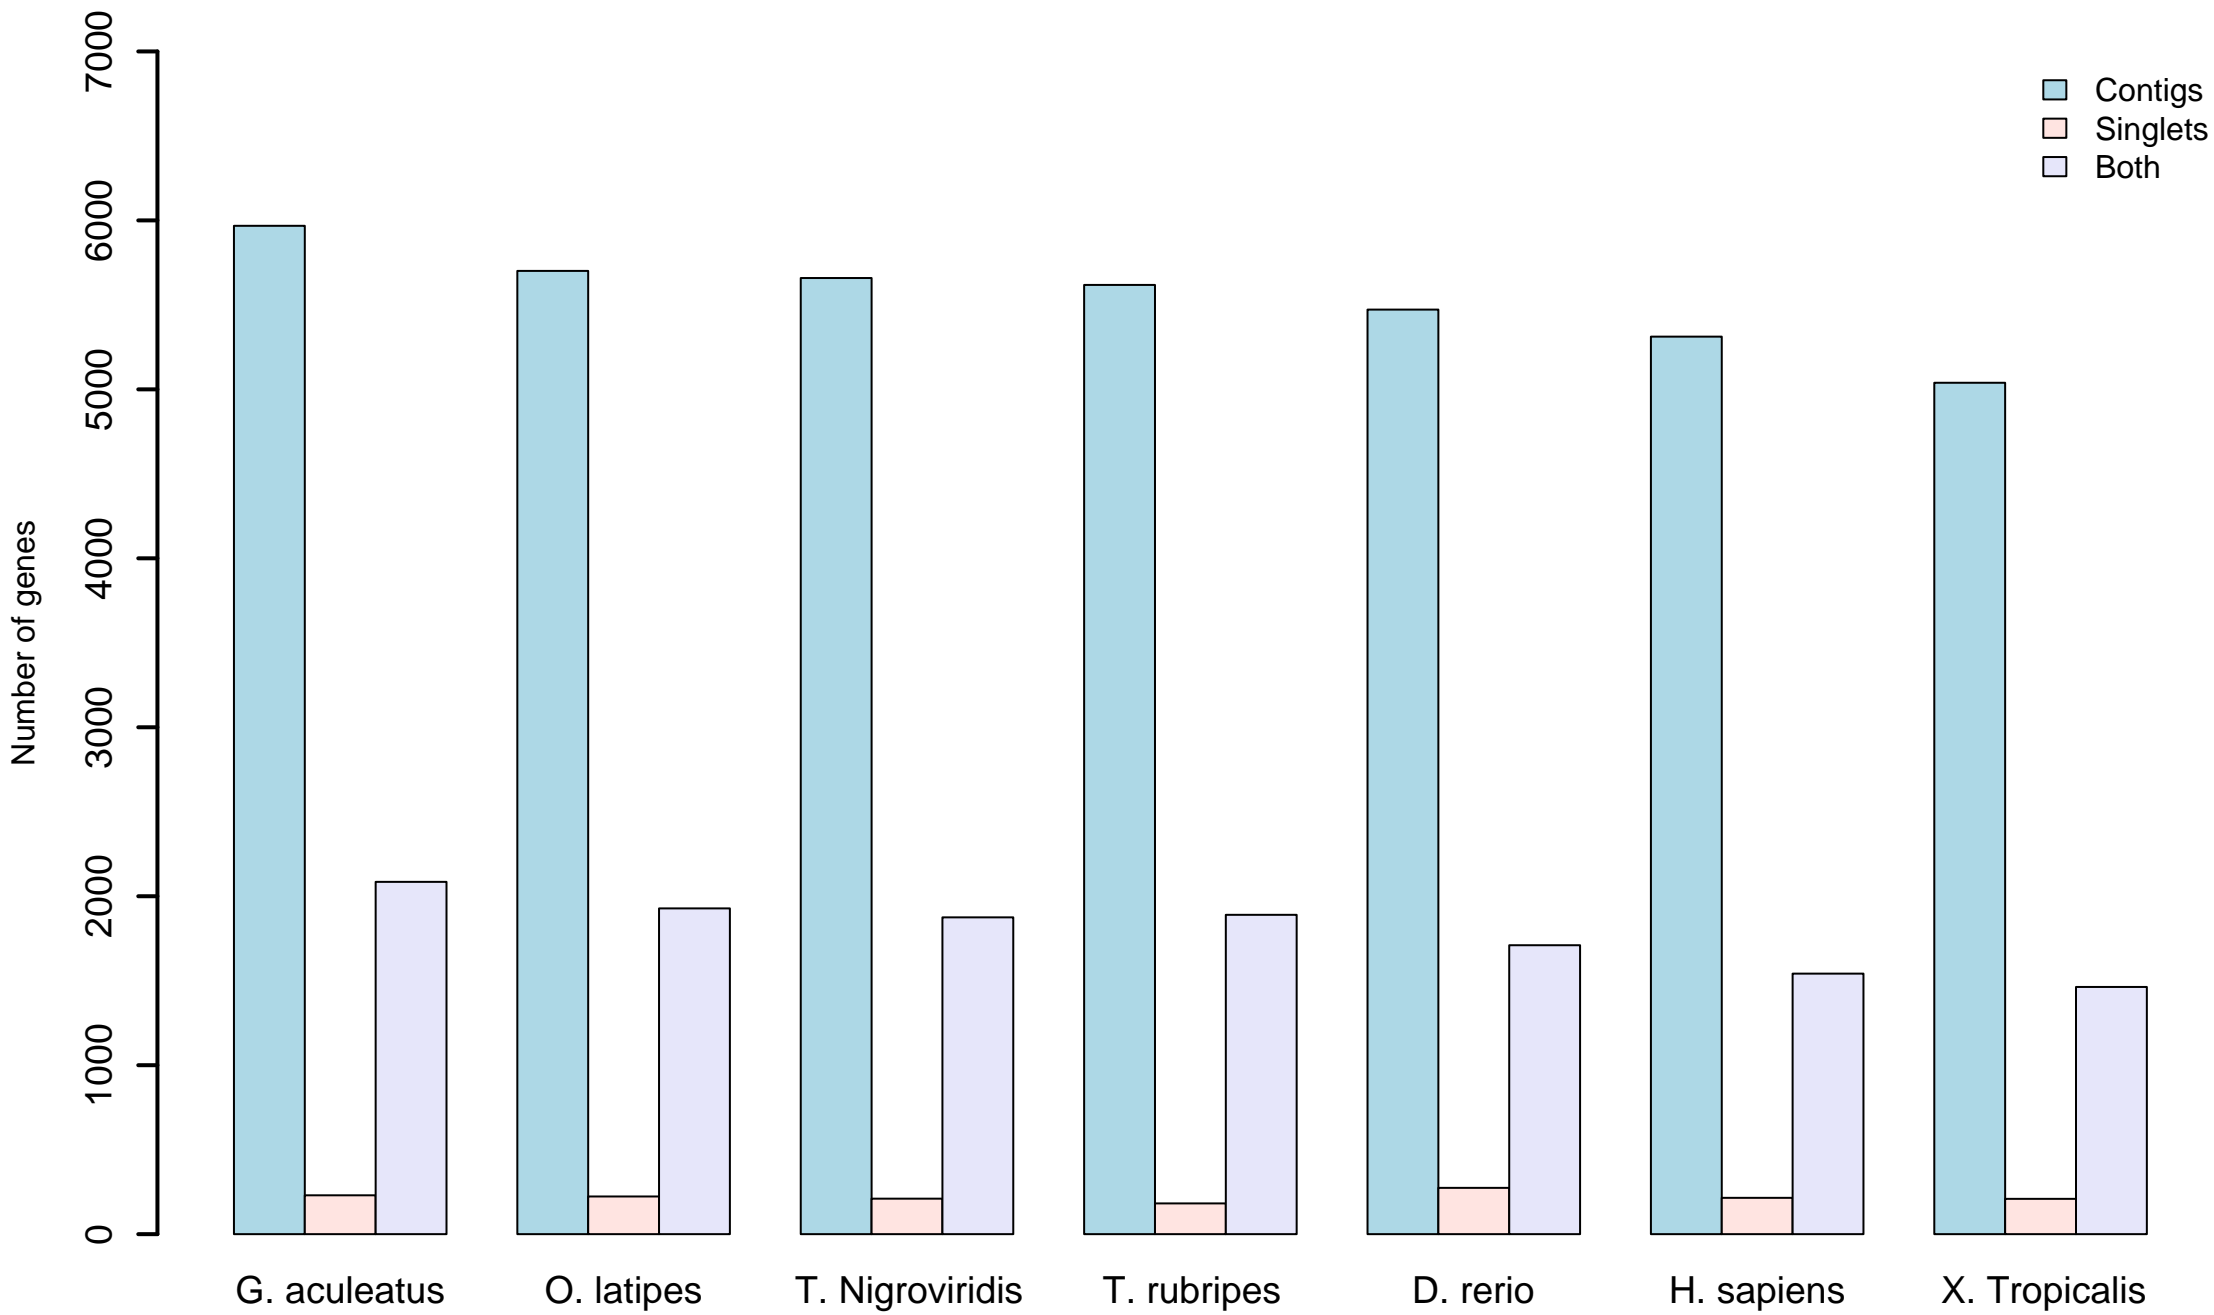

Supplement: 1471-2164-10-345-S1.pdf [file 1471-2164-10-345-S1.pdf]
