# Supplementary material for: Characterization of the Zoarces viviparus liver transcriptome using massively parallel pyrosequencing
Source: PubMed Central journal article supplement (PMC2725146; doi:10.1186/1471-2164-10-345), 2009-07-31

BLAST threshold  $10^{-100}$ , 4601 transcripts, correlation 62.5%

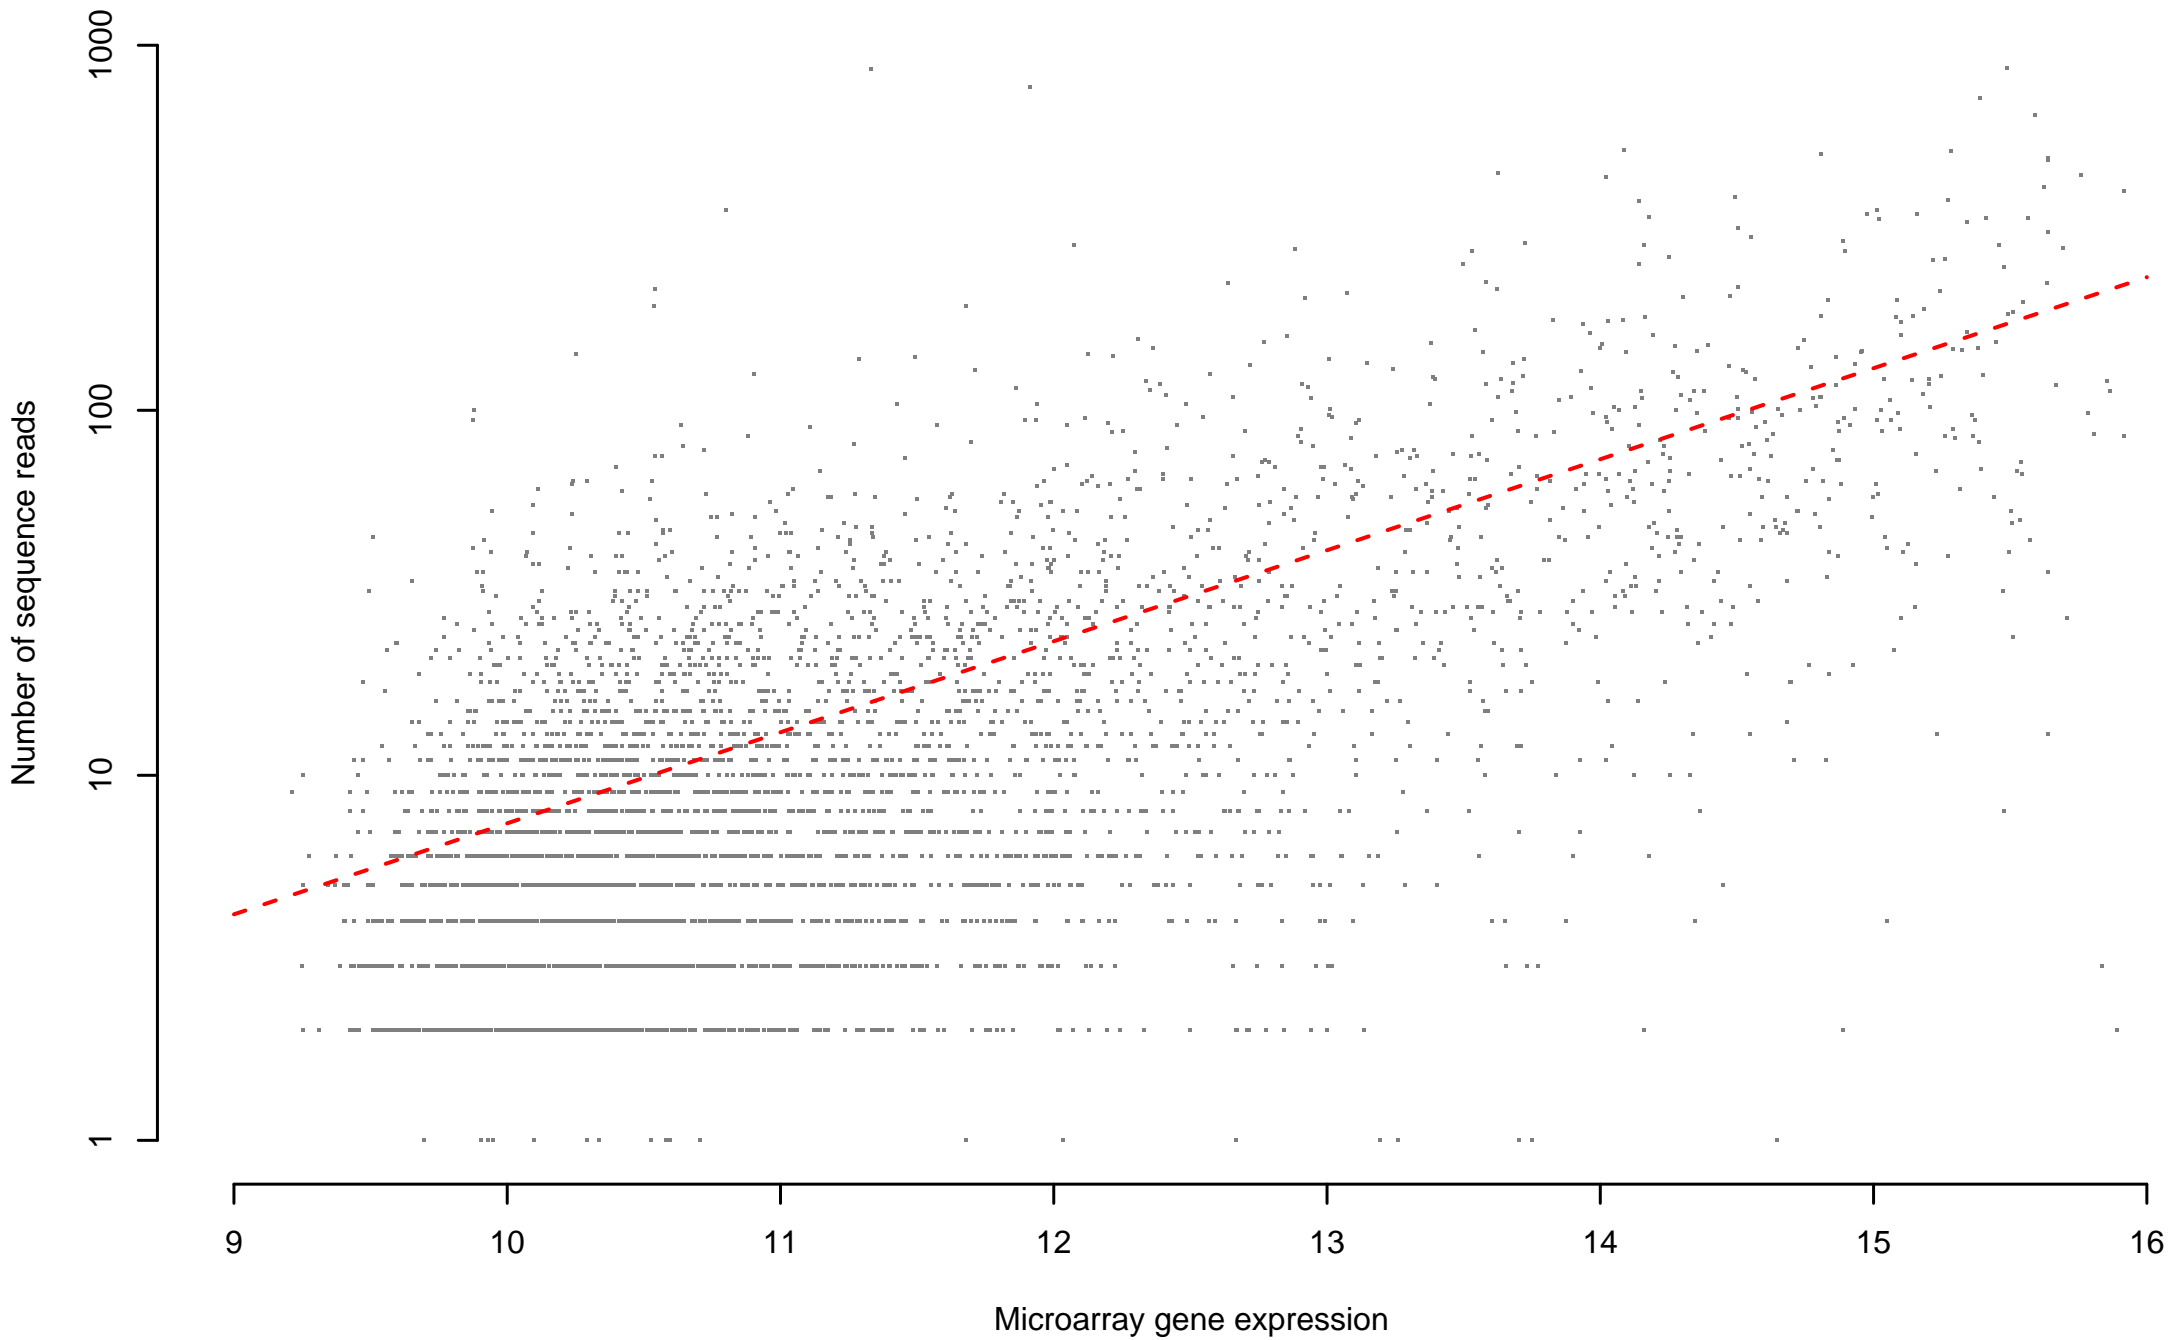

BLAST threshold  $10^{-50}$ , 7160 transcripts, correlation 60.6%

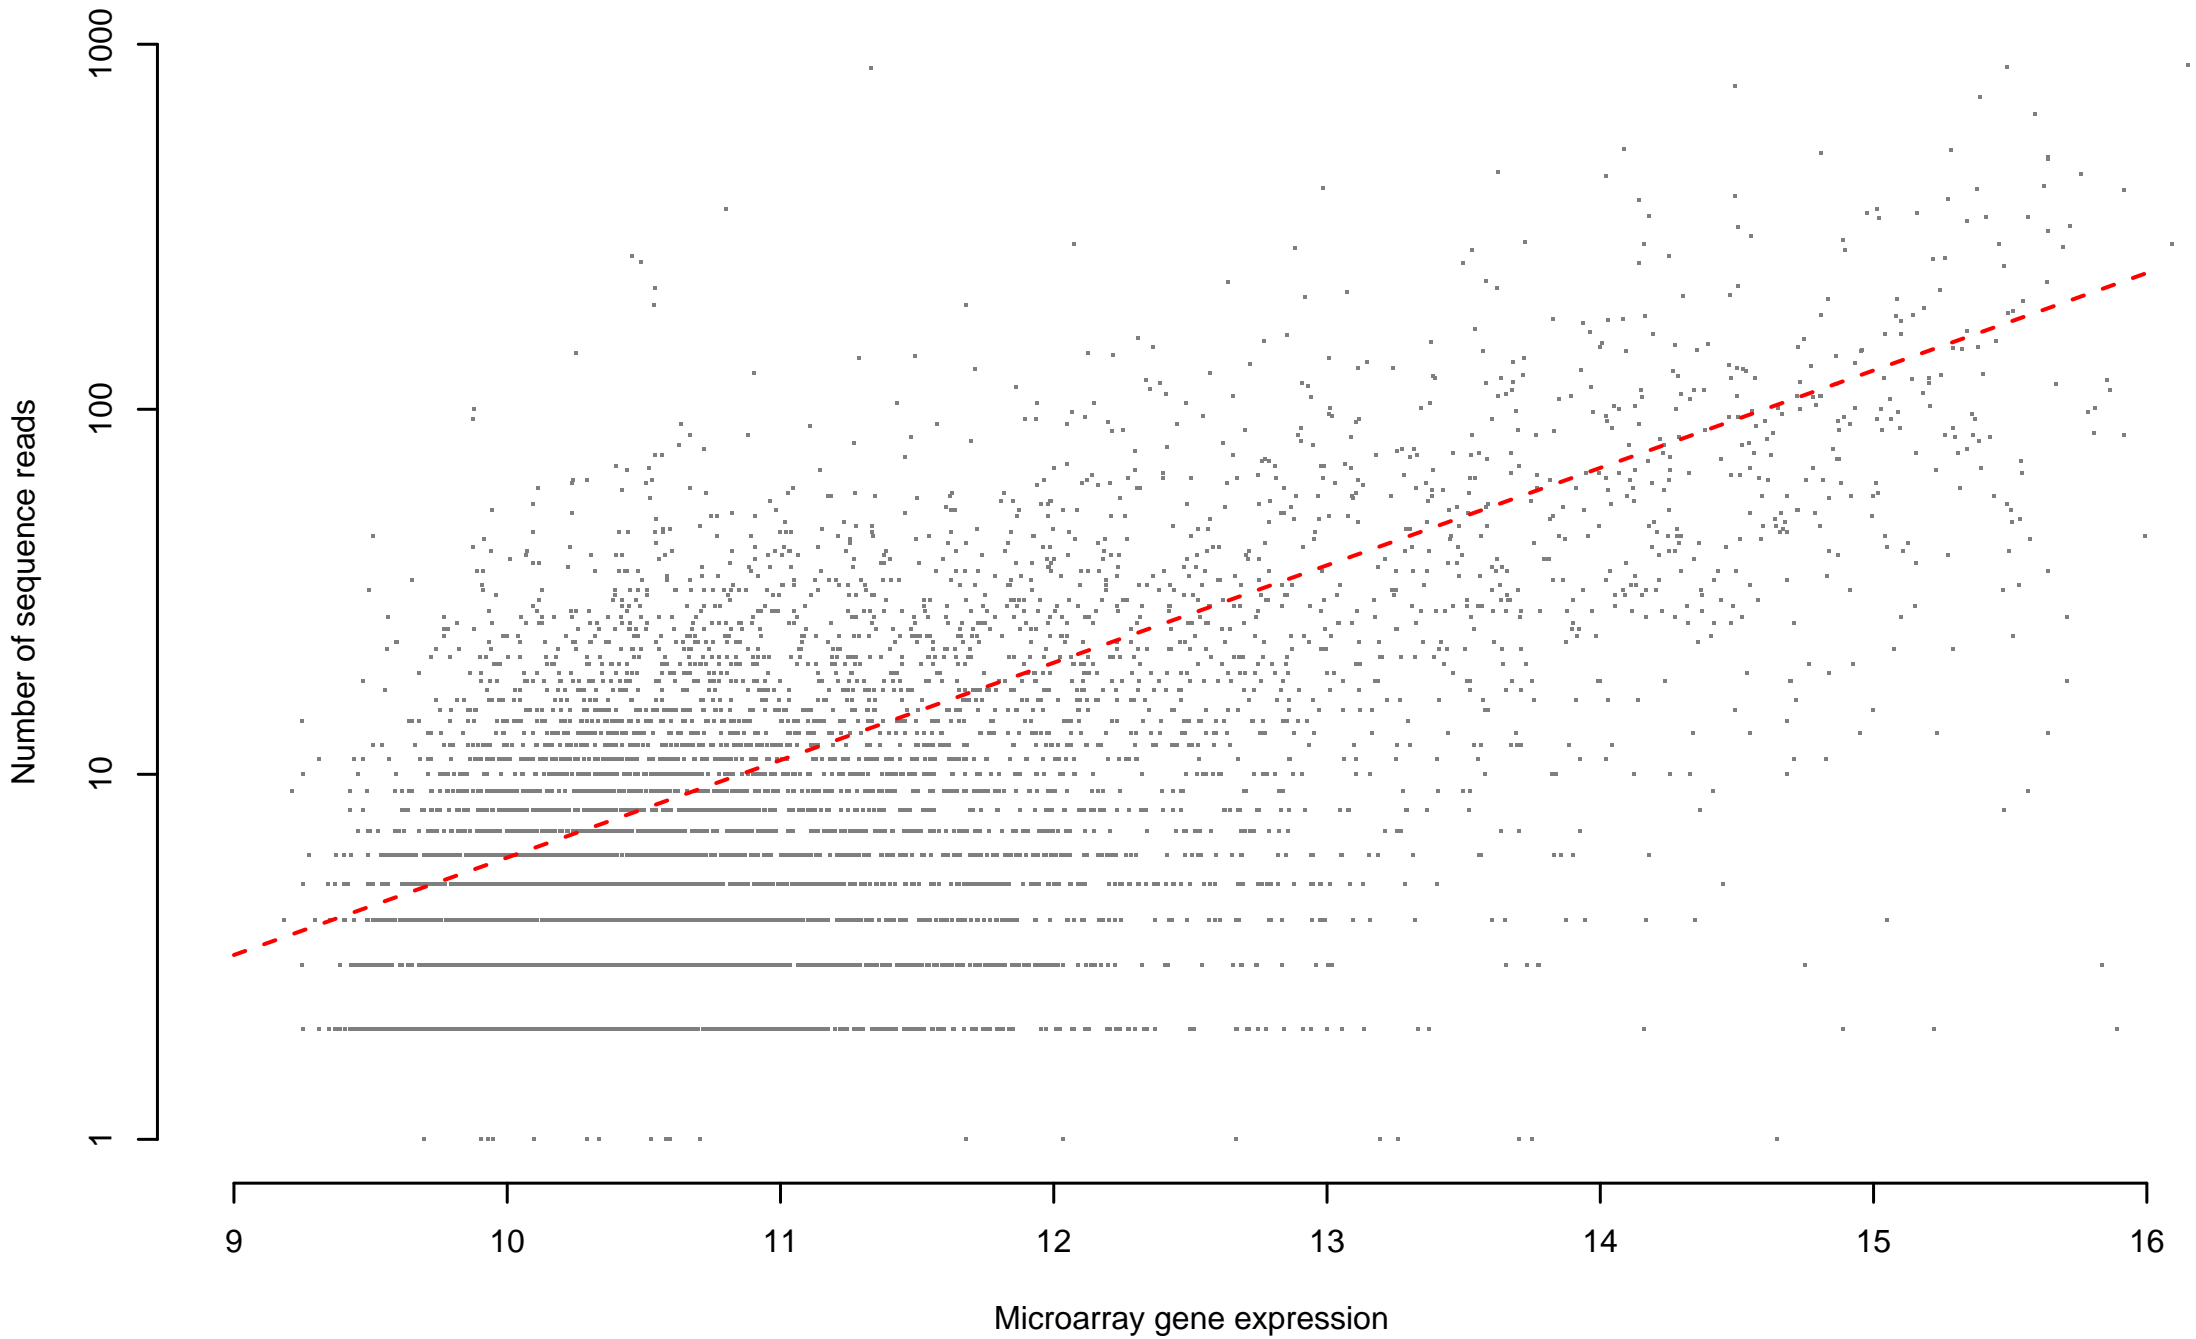

BLAST threshold  $10^{-25}$ , 12556 transcripts, correlation 48.8%

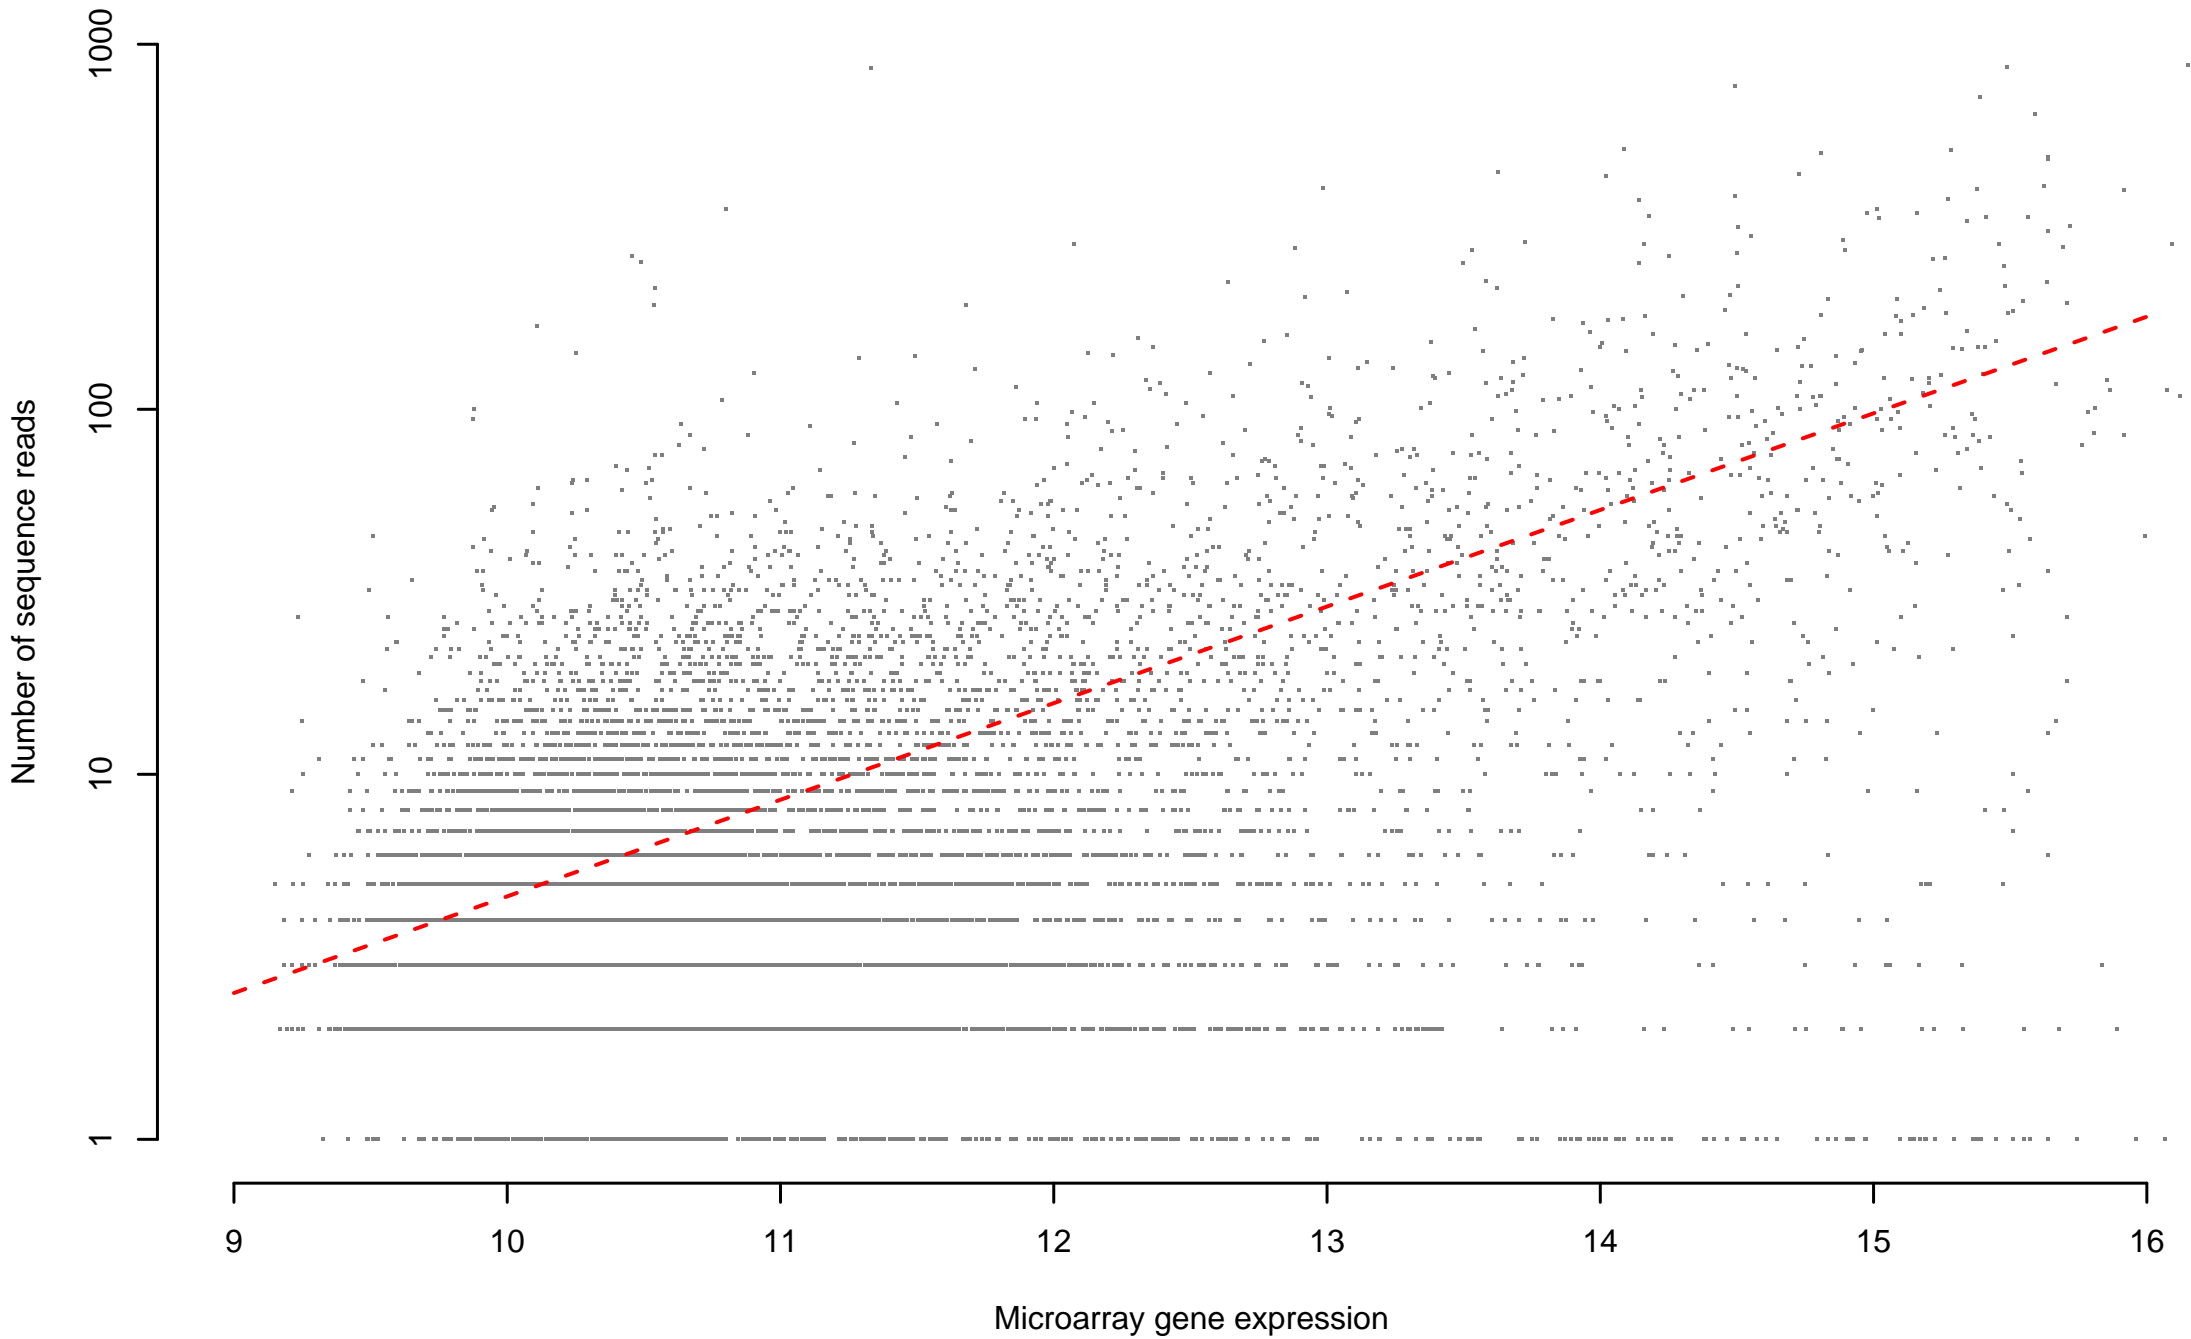

Supplement: 1471-2164-10-345-S2.pdf [file 1471-2164-10-345-S2.pdf]
