# Supplementary material for: Characterization of the Zoarces viviparus liver transcriptome using massively parallel pyrosequencing
Source: PubMed Central journal article supplement (PMC2725146; doi:10.1186/1471-2164-10-345), 2009-07-31

BLAST vs FrameFinder similarity

1.0  
0.8  
0.6  
0.4  
0.2  
0.0

0

20

40

60

80

100

120

$-\log_{10}(\text{E-value})$

Transcript Length

1000

750

500

250

0

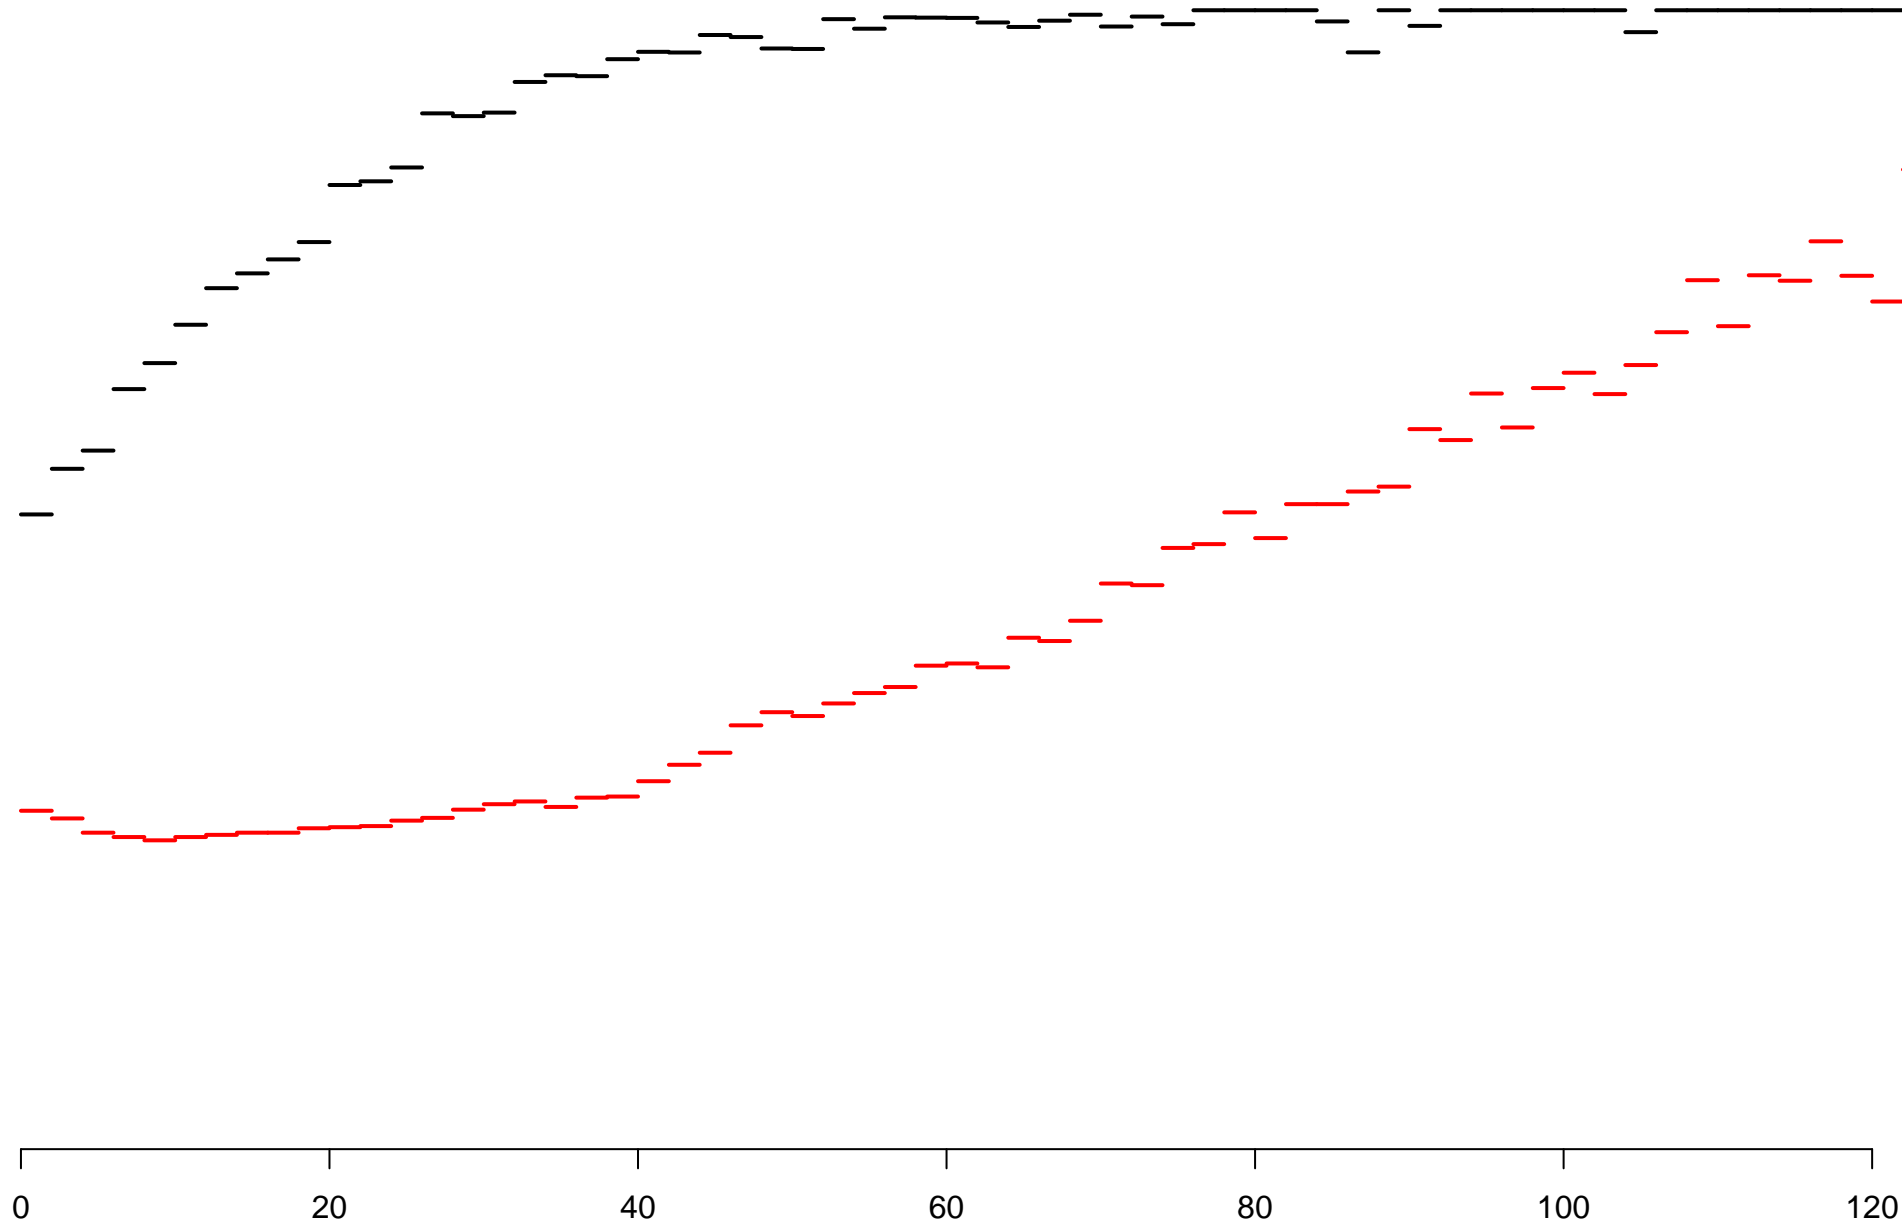

Supplement: 1471-2164-10-345-S5.pdf [file 1471-2164-10-345-S5.pdf]
